# Supplementary material for: Highly effective and selective molecular nanowire catalysts for hydrogen and ammonia synthesis
Source: Royal Society of Chemistry journal article supplement (doi:10.1039/d0ta09722e), 2020-01-01
Supplement: d0ta09722e1.pdf [file d0ta09722e1.pdf]

## Supporting Information

### High effective and selective molecular nanowire catalysts for hydrogen and ammonia synthesis

Qian Wu,<sup>a</sup> Rui Peng,<sup>a</sup> Baibiao Huang,<sup>a</sup> Liangzhi Kou,<sup>b</sup> Ying Dai<sup>\*a</sup> and Yandong Ma<sup>\*a</sup>

<sup>a</sup>School of Physics, State Key Laboratory of Crystal Materials, Shandong University, Shandan Str. 27, Jinan 250100, China

<sup>b</sup>School of Chemistry, Physics and Mechanical Engineering, Queensland University of Technology, Brisbane, Queensland, 4001, Australia

\*Email: [daiy60@sina.com](mailto:daiy60@sina.com) (Y.D.); [yandong.ma@sdu.edu.cn](mailto:yandong.ma@sdu.edu.cn) (Y.M.)

## 1. Methods

### Formation energies ( $E_f$ ) and dissolution potentials ( $U_{diss}$ ) for TM atoms

$$E_f = E_{TM-Pc/PP} - E_{TM} - E_{Pc/PP}$$

where  $E_{TM-Pc/PP}$ ,  $E_{TM}$  and  $E_{Pc/PP}$  are the total energies of TM-Pc/PP nanowires, the chemical potential of single TM atom taken from its most stable bulk structure and the Pc/PP nanowires, respectively.

$$U_{diss} = U_{diss}'(metal,bulk) - E_f/ne$$

where  $U_{diss}'(metal,bulk)$  is the standard dissolution potential of TM bulk,  $n$  is the number of electrons involved in the dissolution, and  $E_f$  is the formation energy of TM atoms.

### HER mechanism

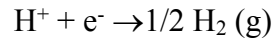

The Gibbs free energy of hydrogen adsorption ( $\Delta G_{H^*}$ )<sup>1</sup> under standard condition can be obtained by

$$\Delta G_{H^*} = \Delta E_{H^*} + \Delta E_{ZPE} - T\Delta S_H$$

where  $\Delta E_H$  is the hydrogen adsorption energy,  $\Delta E_{ZPE}$  and  $T\Delta S_H$  are the zero-point energy difference and entropy difference between adsorbed  $H^*$  atom and gas-phase  $H_2$ , respectively. In detail,  $\Delta E_H$ ,  $\Delta E_{ZPE}$  and  $\Delta S_H$  are given by

$$\Delta E_H = E_{H^*} - E^* - \frac{1}{2}E_{H_2}$$

$$\Delta E_{ZPE} = E_{ZPE}^{H^*} - \frac{1}{2}E_{ZPE}^{H_2}$$

$$\Delta S_H = S_{H^*} - \frac{1}{2}S_{H_2}$$

where  $E_{H^*}$ ,  $E^*$ , and  $E_{H_2}$  are the energies of catalyst with one adsorbed  $H^*$ , TM-Pc/PP, and gas-phase  $H_2$ , respectively.  $E_{ZPE}^{H^*}$  and  $E_{ZPE}^{H_2}$  are the zero-point energies of adsorbed  $H^*$  without the contribution of catalyst and gas-phase  $H_2$ , respectively.  $S_{H^*}$  and  $S_{H_2}$  represent the entropies of adsorbed  $H^*$  atom and gas-phase  $H_2$  at standard condition, respectively.

The entropy is given by<sup>2</sup>

$$S(T) = \sum_{i=1}^{3N} \left[ -R \ln \left( 1 - e^{-\frac{h\nu_i}{k_B T}} \right) + \frac{N_A h \nu_i}{T} \frac{e^{-h\nu_i/k_B T}}{1 - e^{-h\nu_i/k_B T}} \right]$$

where  $R$  stands for the universal gas constant,  $k_B$  is the Boltzmann constant,  $h$  is Plank's constant,  $N_A$  is Avogadro's number,  $\nu_i$  represents the frequency and  $N$  is the number of adsorbed atoms.

In the volcano curve, exchange current density  $i_0$  is calculated as a function of  $\Delta G_{H^*}$  of hydrogen

adsorption according to Nørskov's assumption.<sup>3</sup> If  $\Delta G_{H^*} \leq 0$ ,  $i_0$  at pH = 0 is calculated as

$$i_0 = -ek_0 \frac{1}{1 + \exp\left(\frac{-\Delta G_{H^*}}{k_B T}\right)}$$

If  $\Delta G_{H^*} > 0$ ,  $i_0$  is expressed as

$$i_0 = -ek_0 \frac{1}{1 + \exp\left(\frac{\Delta G_{H^*}}{k_B T}\right)}$$

where  $k_0$  is the rate constant and set to 1 here.

### NRR mechanism

The Gibbs free energy of each elemental step ( $\Delta G$ ) of the NRR are adopted following the works of Nørskov et al.<sup>4,5</sup>

$$\Delta G = \Delta E + \Delta E_{ZPE} - T\Delta S + \Delta G_U + \Delta G_{pH}$$

where  $\Delta E$  is the changed energy,  $\Delta E_{ZPE}$  and  $\Delta S$  are the change of zero point vibrational energy and the change of entropy, and can be obtained by the vibrational frequency of the optimized structures.

T is the temperature and set to 298.15 K. The  $\Delta G_U = -eU$ , where e and U are the transferred charge and the electrode potential.  $\Delta G_{pH}$  is the free energy correction of pH, which can be calculated by:  $\Delta G_{pH} = k_B \times pH \times \ln 10$ , where  $k_B$  is the Boltzmann constant and the value of pH is assumed to be zero.

The overpotentials ( $\eta$ ) is expressed as follows:

$$\eta = U_{equilibrium} - U_{limiting}$$

where  $U_{equilibrium} = -0.16$  V is the equilibrium potential of NRR and  $U_{limiting} = -\Delta G/e$  is the limiting potential of the rate-limiting step, representing the required applied minimum potential to make the entire reaction spontaneous.

## 2. Supplementary Tables

**Table S1.** Calculated formation energies ( $E_f$ ) and dissolution potentials ( $U_{diss}$ ) of TM atoms, the spin moments ( $M$ ) per cell of TM-Pc/PP nanowires, the energies of single TM atom in its most stable bulk structure and the standard dissolution potential of TM (TM = Ti-Zn) bulk. The corresponding single TM atoms energies ( $E_{TM}$ ) of TM bulks and standard dissolution potentials ( $U_{diss}$ ) of TM atoms are listed.

|    | TM-Pc      |                |                 | TM-PP      |                |                 | $E_{TM}$ | $U_{diss}$ |
|----|------------|----------------|-----------------|------------|----------------|-----------------|----------|------------|
|    | $E_f$ (eV) | $U_{diss}$ (V) | $M$ ( $\mu B$ ) | $E_f$ (eV) | $U_{diss}$ (V) | $M$ ( $\mu B$ ) |          |            |
| Ti | -6.21      | 3.11           | 2               | -5.38      | 2.69           | 2               | -7.77    | -1.63      |
| V  | -5.60      | 2.80           | 3               | -4.95      | 2.48           | 3               | -8.94    | -1.18      |
| Cr | -5.90      | 2.95           | 4               | -5.47      | 2.74           | 4               | -9.51    | -0.91      |
| Mn | -4.60      | 2.30           | 3               | -5.44      | 2.72           | 3               | -8.88    | -1.19      |
| Fe | -4.79      | 2.40           | 2               | -4.61      | 2.31           | 2               | -8.31    | -0.45      |
| Co | -4.72      | 2.36           | 1               | -4.61      | 2.31           | 1               | -7.09    | -0.28      |
| Ni | -5.13      | 2.57           | 0               | -5.11      | 2.56           | 0               | -5.47    | -0.26      |
| Cu | -4.34      | 2.17           | 1               | -3.96      | 1.98           | 1               | -3.68    | -0.34      |
| Zn | -5.41      | 2.71           | 0               | -4.75      | 2.38           | 0               | -1.27    | -0.76      |

**Table S2.** Computed Gibbs free energies ( $\Delta G_{*N_2}$ ), bond lengths of N-TM ( $d_{N-TM}$ ) and N-N ( $d_{N-N}$ ), charge transfers ( $\Delta Q$ ) of adsorbed  $N_2$  with end-on and side-on adsorption configurations, and the hydrogen evolution free energies ( $\Delta G_{H^*}$ ) of TM-Pc nanowires (TM = Ti-Zn).

| TM-Pc | end-on                    |                   |                  |                                 | side-on                   |                   |                  |                                 | $\Delta G_{H^*}$<br>(eV) |
|-------|---------------------------|-------------------|------------------|---------------------------------|---------------------------|-------------------|------------------|---------------------------------|--------------------------|
|       | $\Delta G_{*N_2}$<br>(eV) | $d_{N-TM}$<br>(Å) | $d_{N-N}$<br>(Å) | $\Delta Q$<br>(e <sup>-</sup> ) | $\Delta G_{*N_2}$<br>(eV) | $d_{N-TM}$<br>(Å) | $d_{N-N}$<br>(Å) | $\Delta Q$<br>(e <sup>-</sup> ) |                          |
| Ti    | -0.62                     | 2.03              | 1.121            | 0.26                            | -0.26                     | 2.12              | 1.177            | 0.44                            | 0.30                     |
| V     | -0.42                     | 1.95              | 1.119            | 0.23                            | 0.24                      | 2.21              | 1.148            | 0.26                            | 0.51                     |
| Cr    | 0.40                      | 3.01              | 1.114            | 0.01                            | 1.22                      | 2.08              | 1.163            | 0.32                            | 0.35                     |
| Mn    | 0.38                      | 2.42              | 1.118            | 0.02                            | 0.42                      | 2.40              | -                | -                               | 0.44                     |
| Fe    | 0.12                      | 1.76              | 1.126            | 0.26                            | 0.11                      | 1.77              | -                | -                               | 0.27                     |

|    |      |      |       |       |      |      |   |   |       |
|----|------|------|-------|-------|------|------|---|---|-------|
| Co | 0.20 | 1.99 | 1.118 | 0.09  | 0.20 | 1.99 | - | - | -0.07 |
| Ni | 0.43 | 3.19 | 1.114 | 0.06  | 0.42 | 3.15 | - | - | 1.79  |
| Cu | 0.43 | 3.14 | 1.113 | -0.01 | 0.43 | 3.28 | - | - | 2.98  |
| Zn | 0.40 | 3.01 | 1.113 | -0.02 | 0.43 | 3.29 | - | - | 1.54  |

**Table S3.** Computed Gibbs free energies ( $\Delta G_{*N_2}$ ), bond lengths of N-TM ( $d_{N-TM}$ ) and N-N ( $d_{N-N}$ ), charge transfers ( $\Delta Q$ ) of adsorbed  $N_2$  with end-on and side-on adsorption configurations, and the hydrogen evolution free energies ( $\Delta G_{H^*}$ ) of TM-PP nanowires (TM = Ti-Zn).

| TM-PP | end-on                    |                   |                  |                                 | side-on                   |                   |                  |                                 | $\Delta G_{H^*}$<br>(eV) |
|-------|---------------------------|-------------------|------------------|---------------------------------|---------------------------|-------------------|------------------|---------------------------------|--------------------------|
|       | $\Delta G_{*N_2}$<br>(eV) | $d_{N-TM}$<br>(Å) | $d_{N-N}$<br>(Å) | $\Delta Q$<br>(e <sup>-</sup> ) | $\Delta G_{*N_2}$<br>(eV) | $d_{N-TM}$<br>(Å) | $d_{N-N}$<br>(Å) | $\Delta Q$<br>(e <sup>-</sup> ) |                          |
| Ti    | -0.44                     | 2.03              | 1.134            | 0.35                            | 0.01                      | 2.15              | 1.168            | 0.37                            | 2.90                     |
| V     | -0.41                     | 1.94              | 1.134            | 0.25                            | 0.30                      | 2.21              | 1.147            | 0.33                            | 2.86                     |
| Cr    | 0.32                      | 2.93              | 1.115            | 0.03                            | 1.20                      | 2.07              | 1.165            | 0.34                            | 0.32                     |
| Mn    | 0.30                      | 2.40              | 1.115            | 0.03                            | 0.31                      | 2.44              | -                | -                               | -0.57                    |
| Fe    | 0.00                      | 1.73              | 1.135            | 0.24                            | 0.02                      | 1.74              | -                | -                               | 0.34                     |
| Co    | 0.13                      | 1.94              | 1.123            | 0.08                            | 0.13                      | 1.94              | -                | -                               | -0.04                    |
| Ni    | 0.42                      | 3.13              | 1.114            | 0.00                            | 0.42                      | 3.13              | -                | -                               | 1.40                     |
| Cu    | 0.42                      | 3.11              | 1.114            | -0.02                           | 0.42                      | 3.33              | -                | -                               | 1.89                     |
| Zn    | 0.41                      | 2.99              | 1.114            | 0.00                            | 0.43                      | 3.28              | -                | -                               | 3.97                     |

**Table S4.** Computed Faraday efficiency (FE) for Ti/Mo-Pc/PP nanowires.

|    | Ti-Pc | Ti-PP | Mo-Pc | Mo-PP |
|----|-------|-------|-------|-------|
| FE | 0     | 100%  | 100%  | 97%   |

**Table S5.** Computed formation energies ( $E_f$ ), dissolution potentials ( $U_{diss}$ ) and spin moments (M) per cell for Mo-Pc/PP nanowires.

|                | Mo-Pc | Mo-PP |
|----------------|-------|-------|
| $E_f$ (eV)     | -3.87 | -3.73 |
| $U_{diss}$ (V) | 1.09  | 1.04  |

### 3. Supplementary Figures

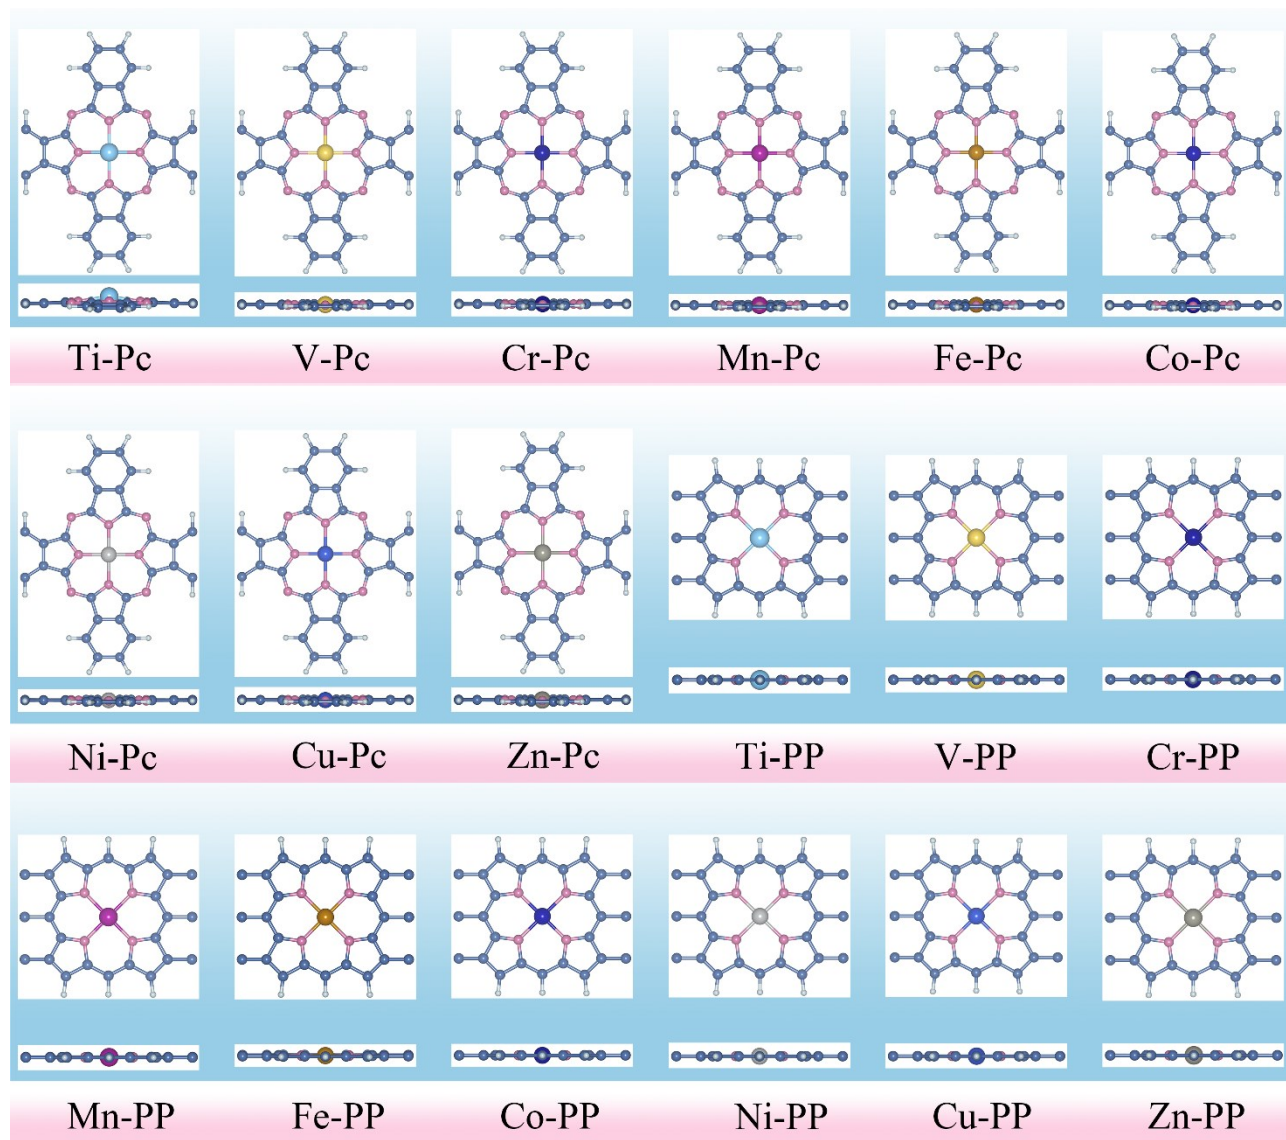

**Figure S1.** Crystal structures of the unit cell of TM-Pc/PP nanowires (TM = Ti-Zn).

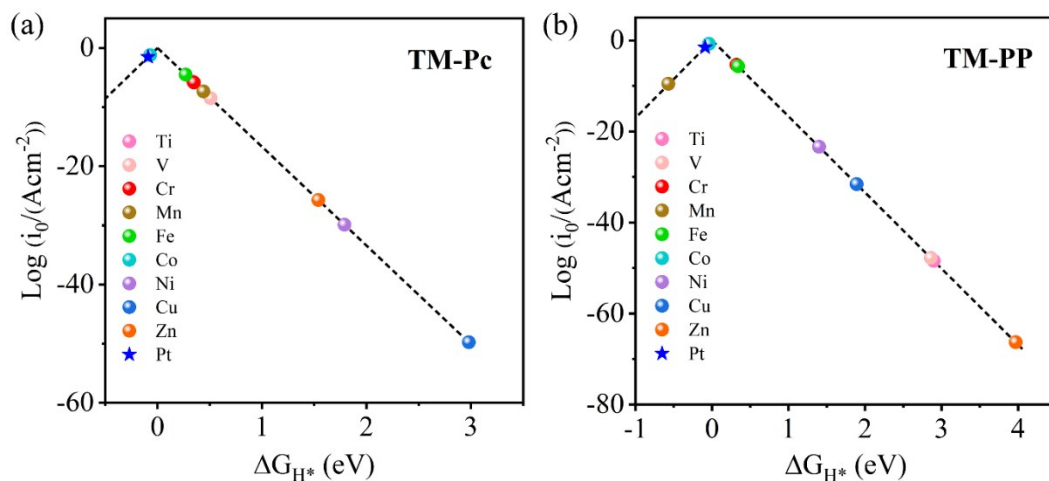

**Figure S2.** Volcano curve of exchange current ( $i_0$ ) as a function of  $\Delta G_{H^*}$  for (a) TM-Pc and (b) TM-PP nanowires (TM = Ti-Zn), and the volcano curve of Pt is also shown in for comparison.

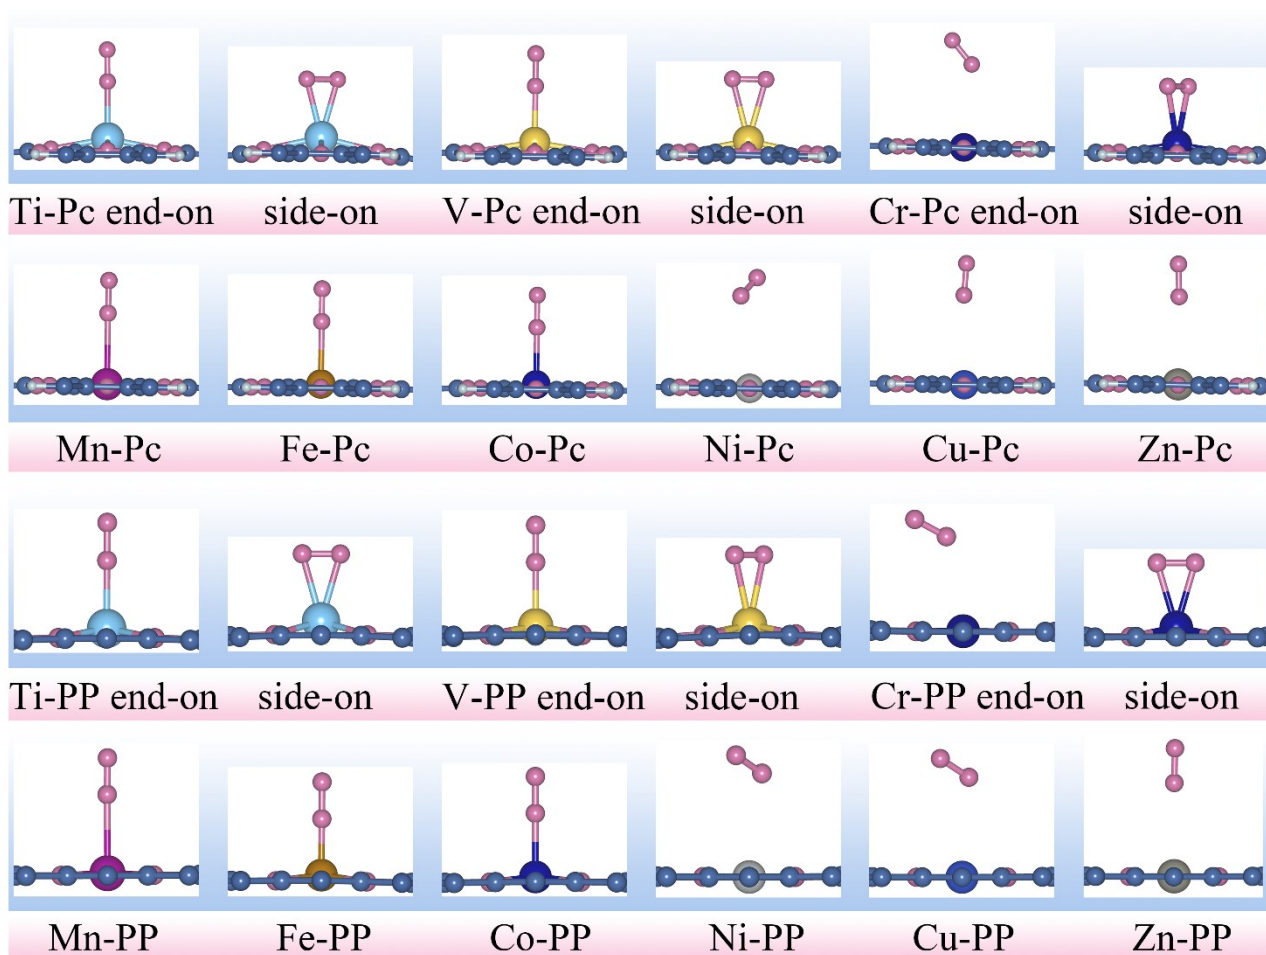

**Figure S3.** Crystal structures of  $N_2$  adsorbed TM-Pc/PP nanowires with end-on and side-on configurations (TM = Ti-Zn).







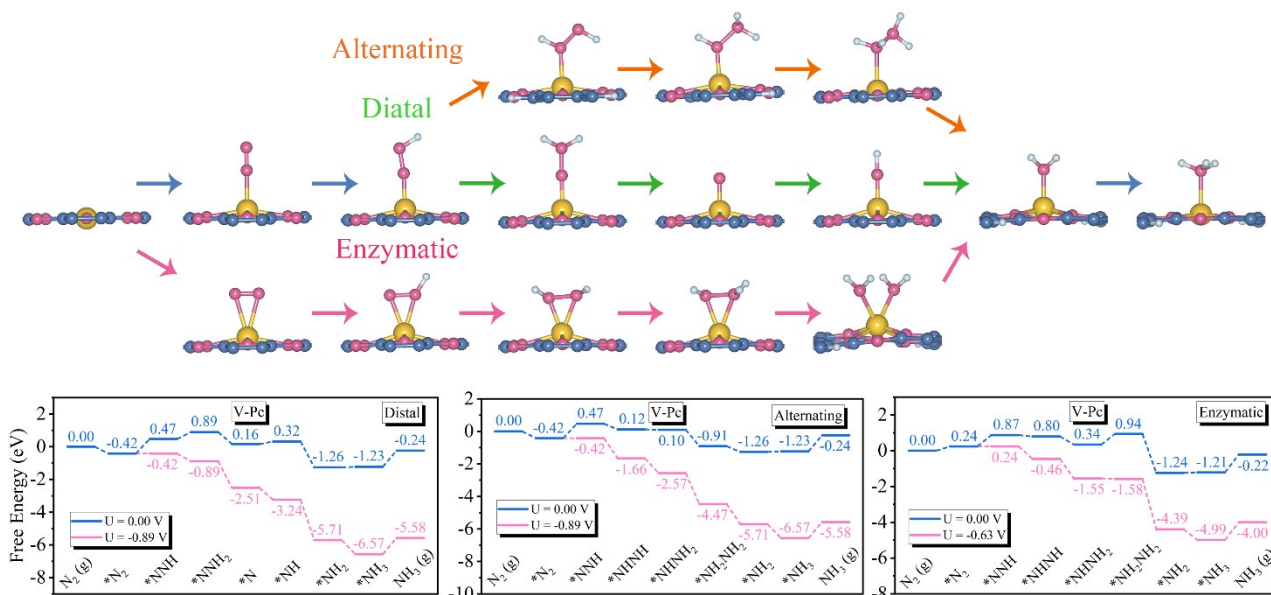

**Figure S6.** Crystal structures of various intermediates along the distal, alternating and enzymatic pathways of NRR on V-Pc nanowire. And the corresponding free-energy diagrams for the NRR process on V-Pc through distal, alternating, and enzymatic mechanisms.

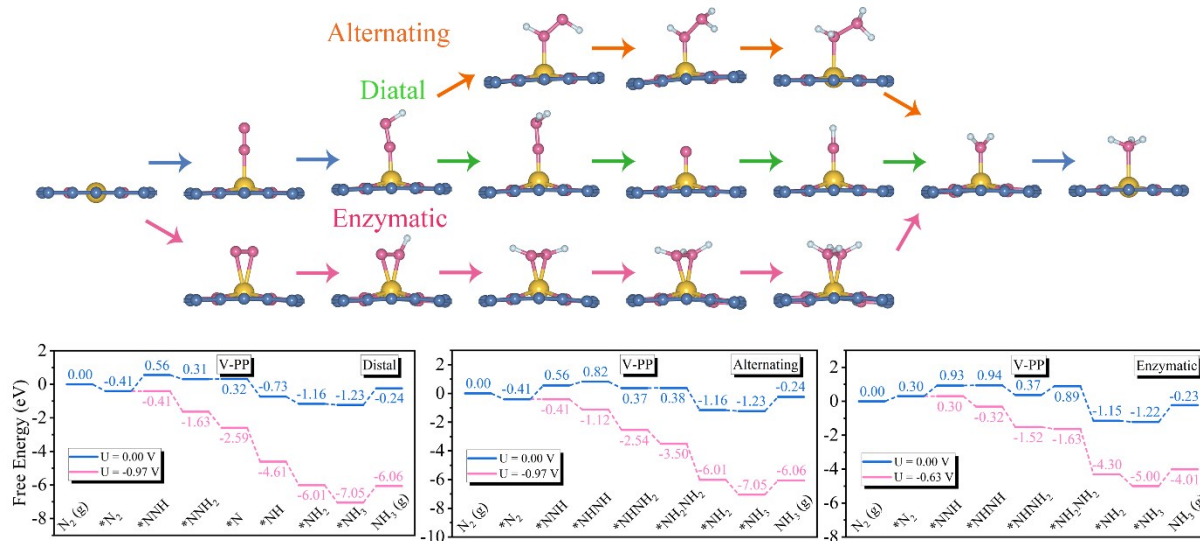

**Figure S7.** Crystal structures of various intermediates along the distal, alternating and enzymatic pathways of NRR on V-PP nanowire. And the corresponding free-energy diagrams for the NRR process on V-PP through distal, alternating, and enzymatic mechanisms.

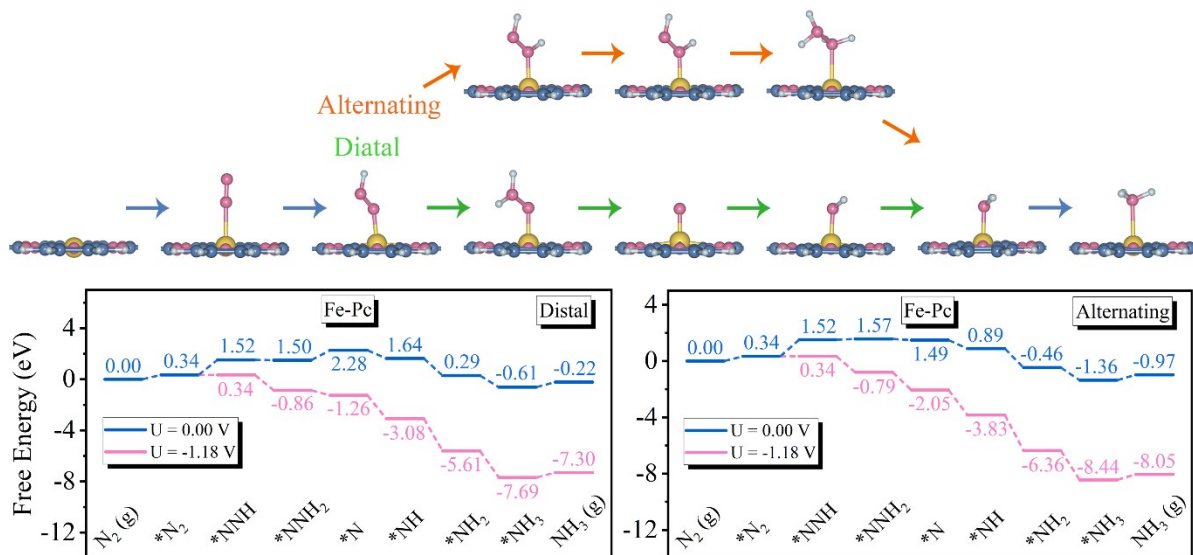

**Figure S8.** Crystal structures of various intermediates along the distal and alternating pathways of NRR on Fe-Pc nanowire. And the corresponding free-energy diagrams for the NRR process on Fe-Pc through distal and alternating mechanisms.

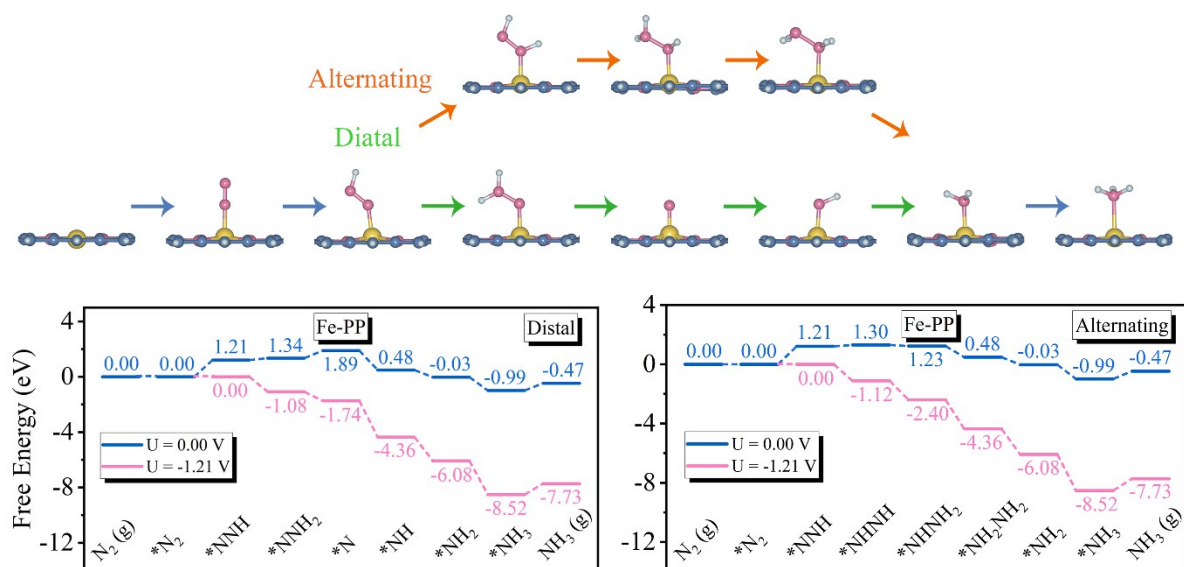

**Figure S9.** Crystal structures of various intermediates along the distal and alternating pathways of NRR on Fe-PP nanowire. And the corresponding free-energy diagrams for the NRR process on Fe-PP through distal and alternating mechanisms.

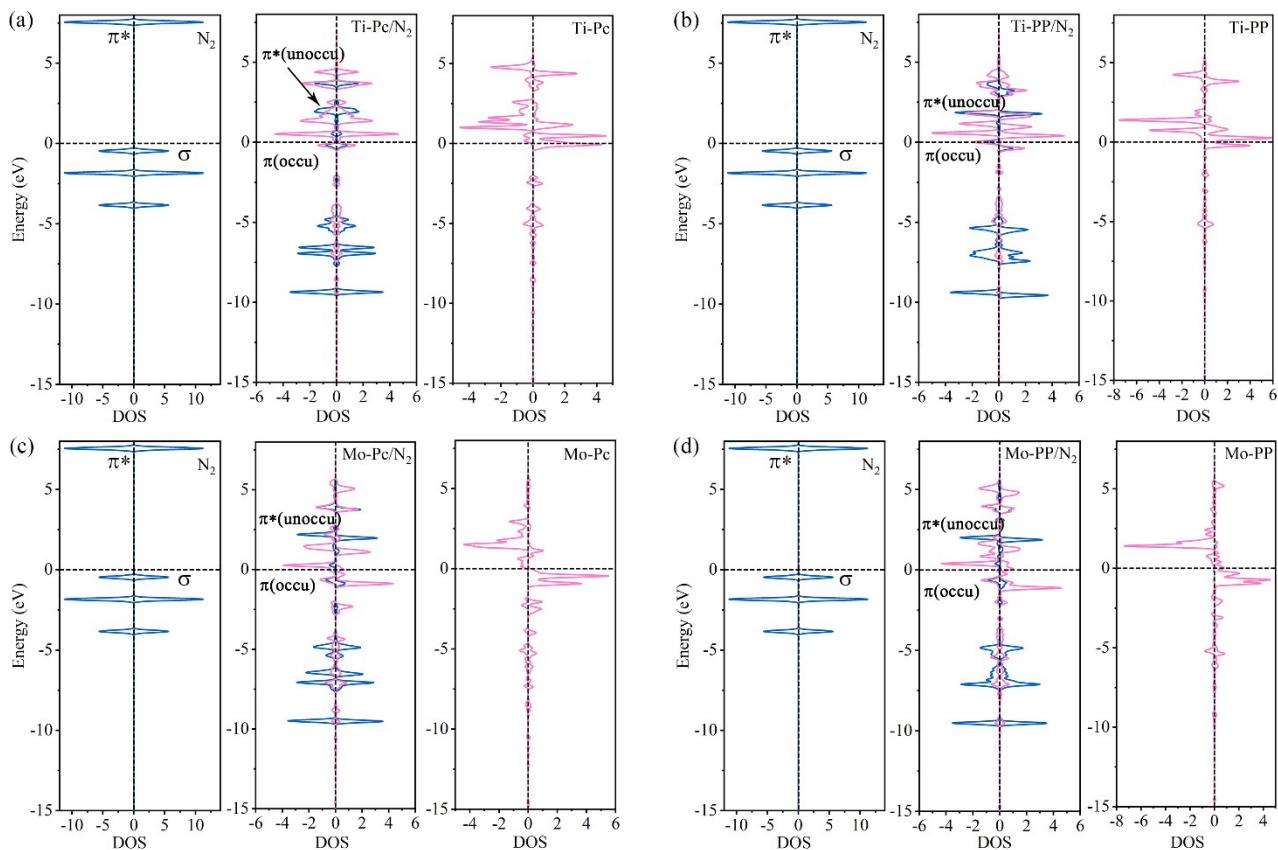

**Figure S10.** Projected density of states (PDOS) of free  $N_2$ ,  $N_2$  adsorption on Ti/Mo-Pc/PP and free Ti/Mo-Pc/PP.

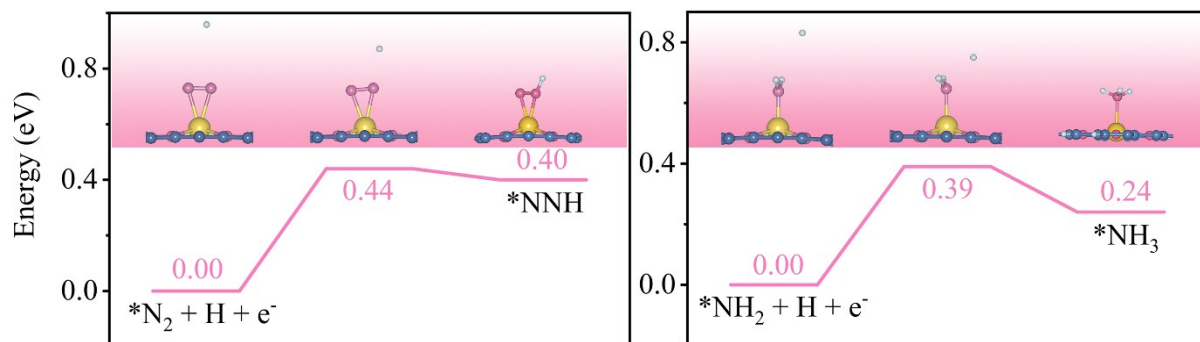

**Figure S11.** Crystal structures and related kinetic barriers of  $*N_2$  and  $*NH_2$  hydrogenation steps on Ti-PP nanowire.

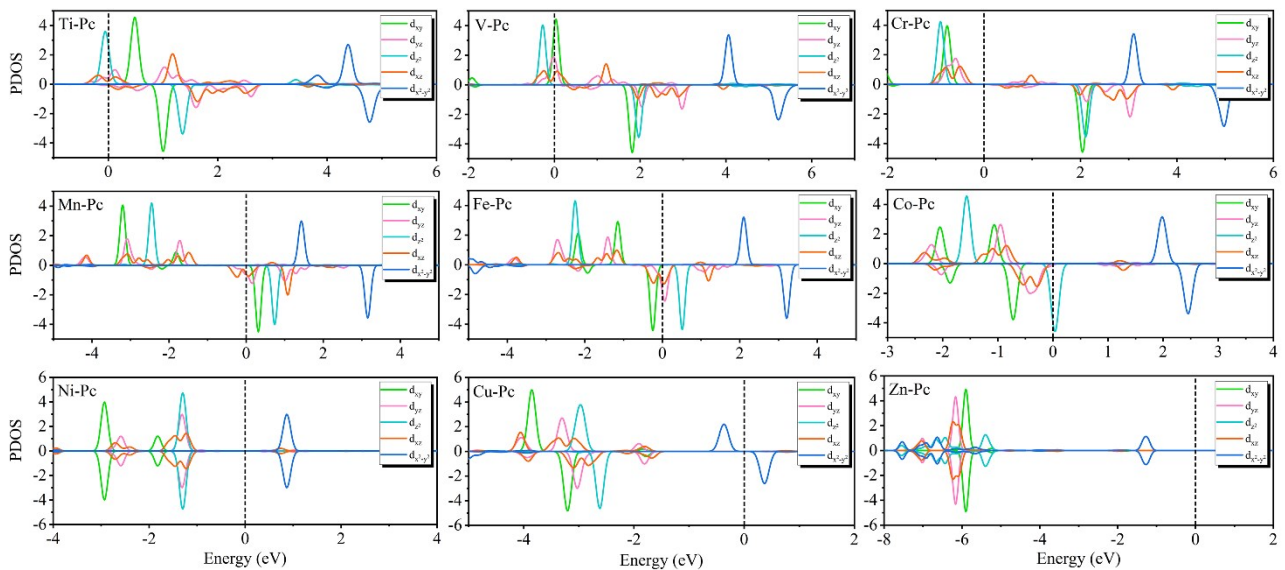

**Figure S12.** Computed projected density of states (PDOS) of d orbitals for TM-Pc nanowires (TM = Ti-Zn).

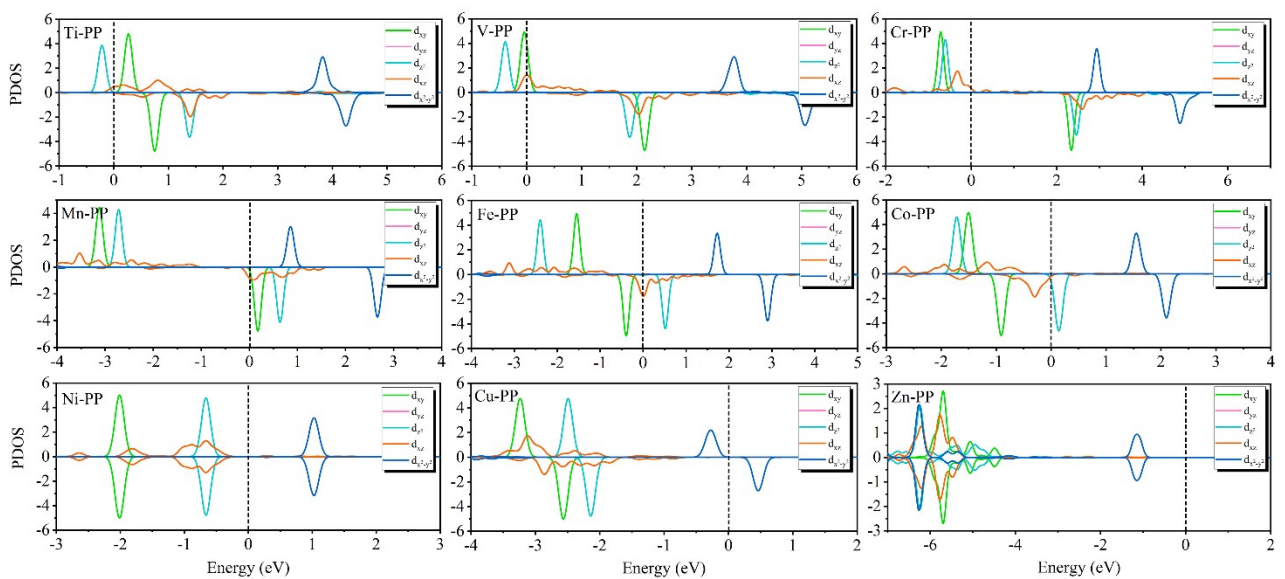

**Figure S13.** Computed projected density of states (PDOS) of d orbitals for TM-PP nanowires (TM = Ti-Zn).



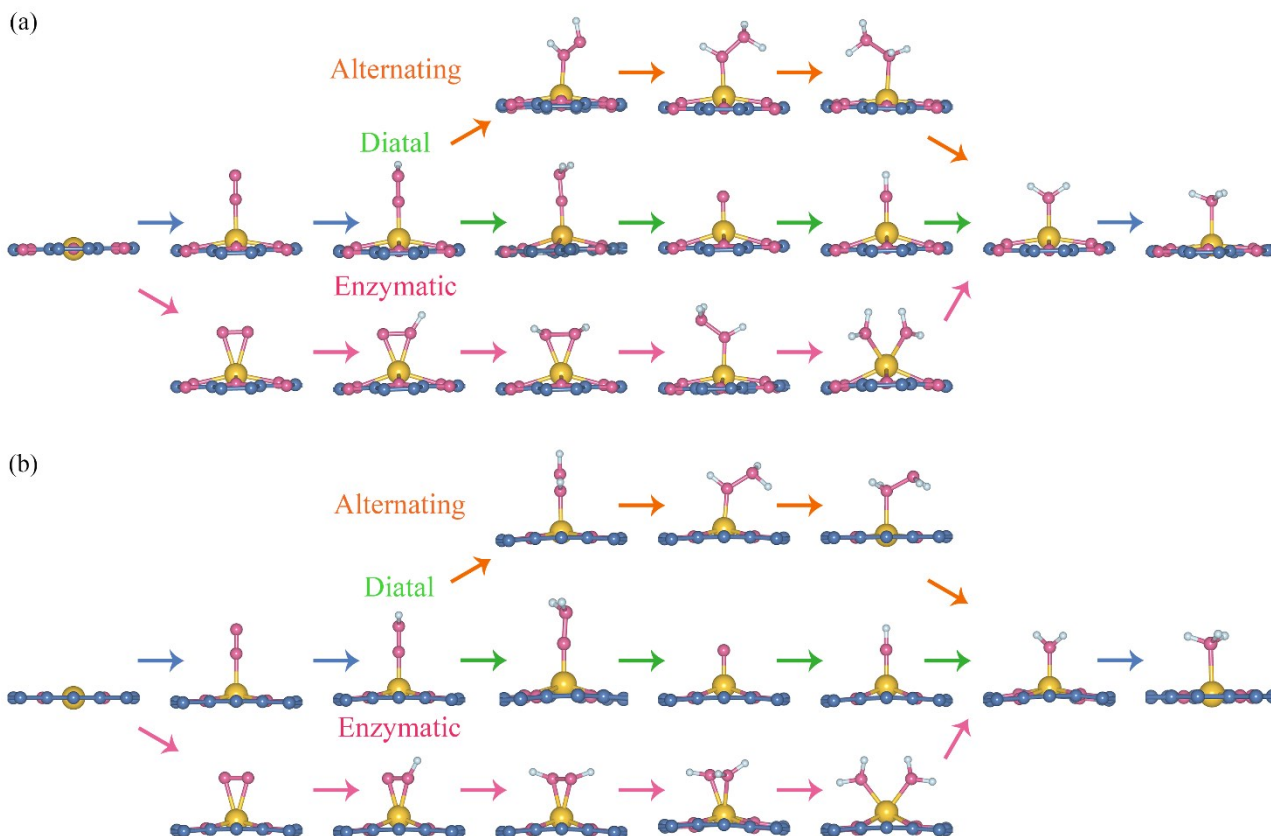

**Figure S14.** Crystal structures of various intermediates along the distal, alternating and enzymatic pathways of NRR on Mo-Pc and Mo-PP nanowires.

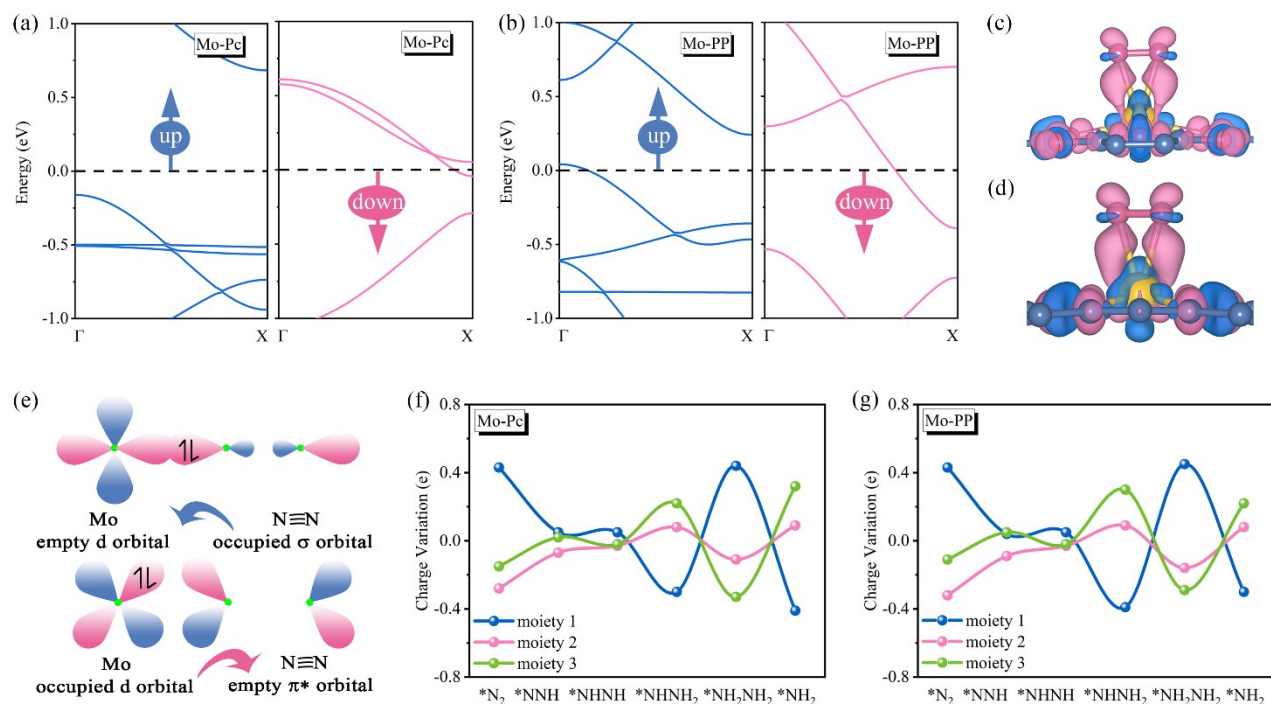

**Figure S15.** Band structures of (a) Mo-Pc and (b) Mo-PP, with blue (pink) lines indicating the majority (minority) spin channel. The Fermi level is set to zero. Charge density difference of  $N_2$  adsorbed (c) Mo-Pc and (d) Mo-PP with side-on configuration. The isosurface value is set to be 0.01

$\text{e}/\text{\AA}^3$ , and positive (negative) charges are shown in pink (blue). (e) Simplified schematic of  $\text{N}_2$  bonding to Mo atom. Charge variation of the three moieties for (f) Mo-Pc and (g) Mo-PP along the enzymatic pathway. Moieties 1, 2 and 3 in (f,g) indicate the  $^*\text{N}_x\text{H}_y$ , Ti atom and Pc/PP, respectively.

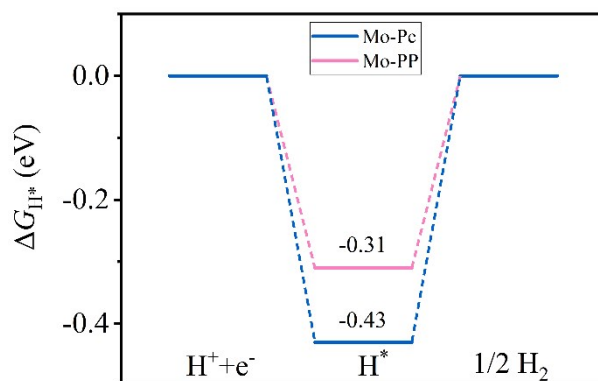

**Figure S16.** Gibbs free energy diagrams for the HER process of Mo-Pc and Mo-PP nanowires.

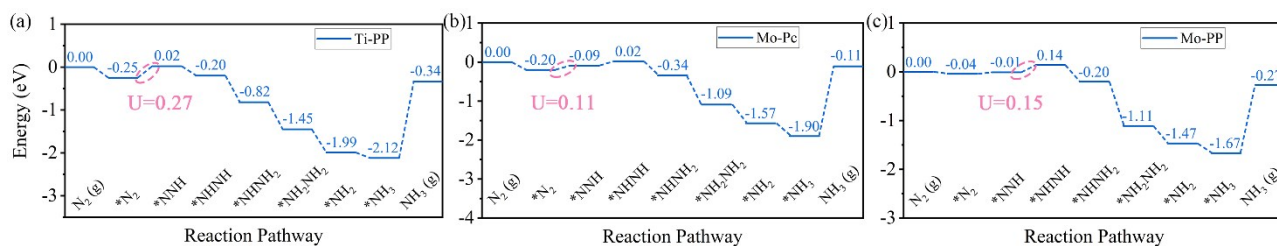

**Figure S17.** Gibbs free energy diagrams for the NRR process of Ti-PP and Mo-Pc/PP nanowires along the most preferred distal reaction pathway after considering the solvation effects.

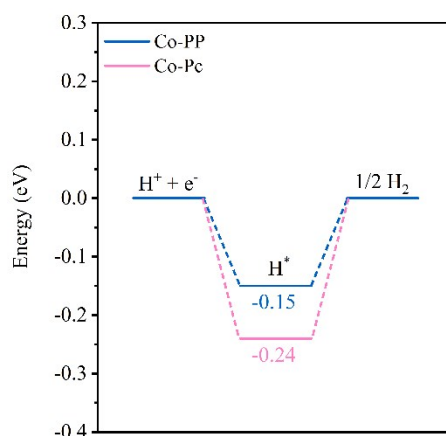

**Figure S18.** Gibbs free energy diagrams for the HER process of Co-Pc and Co-PP nanowires after

considering the solvation effects.

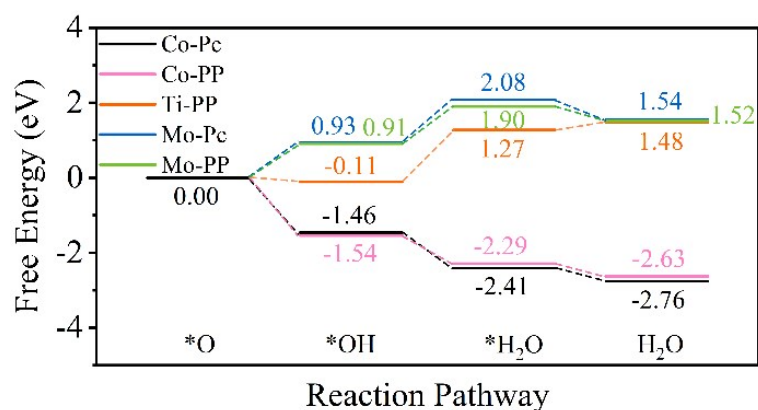

**Figure S19.** Relative free energy changes along the deoxidation/dehydroxylation process on the Ti-PP, Mo-Pc/PP and Co-Pc/PP surfaces at the potential of  $U = 0$ .

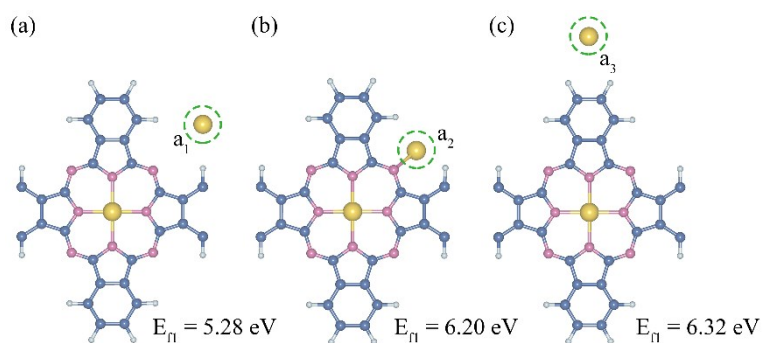

**Figure S20.** Possible anchoring sites of Mo atom on the edge of Mo-Pc nanowires. The corresponding formation energies are included.



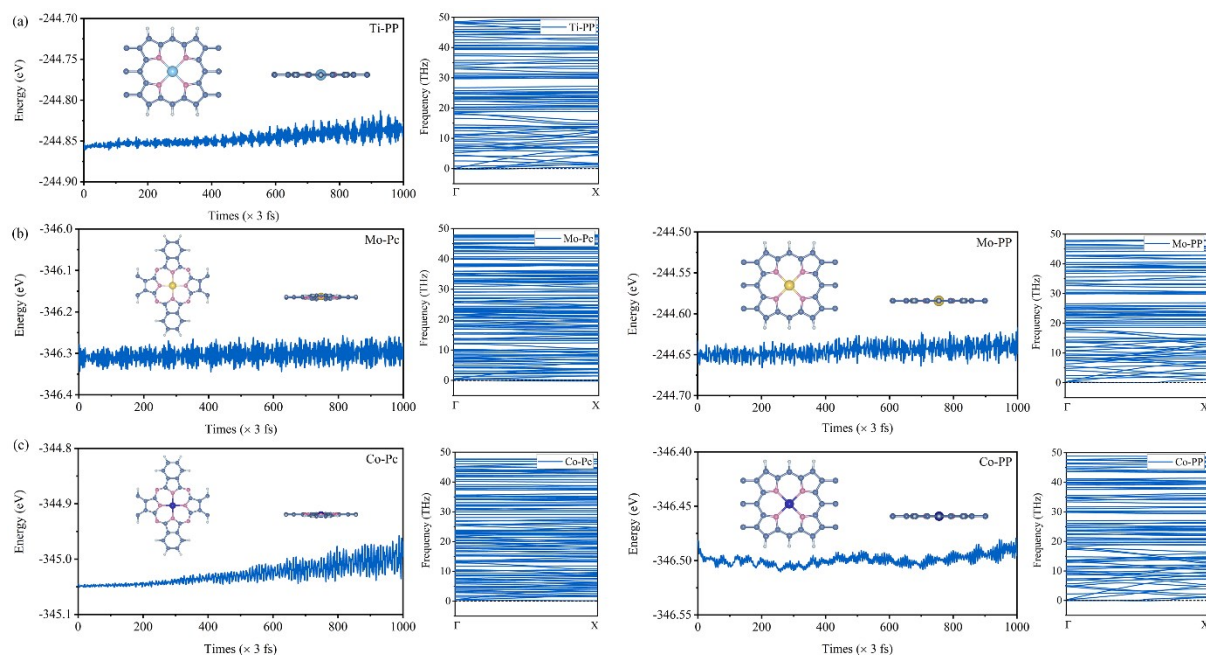

**Figure S21.** Phonon dispersion spectra and the total energy as a function of time at 300 K during AIMD simulations for (a) Ti-PP, (b) Mo-Pc/PP and (c) Co-Pc/PP nanowires. Insets are structures after 3 ps AIMD simulations.

#### 4. References

- (1) C. Tsai, F. Abild-Pedersen and J. K. Nørskov, *Nano Lett.*, 2014, **14**, 1381–1387.
- (2) Y. A. Zhu, D. Chen, X. G. Zhou and W. K. Yuan, *Catal. Today*, 2009, **148**, 260–267.
- (3) J. K. Nørskov, T. Bligaard, A. Logadottir, J. R. Kitchin, J. G. Chen, S. Pandalov and U. Stimming, *J. Electrochem. Soc.*, 2005, **152**, J23–J26.
- (4) J. K. Nørskov, J. Rossmeisl, A. Logadottir, L. Lindqvist, J. R. Kitchin, T. Bligaard and H. J. K. Jonsson, *J. Phys. Chem. B*, 2004, **108**, 17886–17892.
- (5) A. A. Peterson, F. Abild-Pedersen, F. Studt, J. Rossmeisl and J. K. Nørskov, *Energy Environ. Sci.*, 2010, **3**, 1311–1315.
